# Supplementary material for: Antiproliferative and Proapoptotic Effects of Phenanthrene Derivatives Isolated from Bletilla striata on A549 Lung Cancer Cells
Source: MDPI journal article supplement (doi:10.3390/molecules27113519), 2022-05-30
Supplement: s1 [file s1]

## **Supplementary material**

**Antiproliferative and proapoptotic effects of phenanthrene derivatives  
isolated from *Bletilla striata* on A549 lung cancer cells**

## The List of Contents

| No | Content                                                                                                 | Page |
|----|---------------------------------------------------------------------------------------------------------|------|
| 1  | <b>Figure S1.</b> The UV spectrum of compound <b>1</b> in MeCN                                          | S1   |
| 2  | <b>Figure S2.</b> The IR spectrum of compound <b>1</b>                                                  | S2   |
| 3  | <b>Figure S3.</b> The (–)-HR-ESI-MS spectroscopic data of compound <b>1</b>                             | S3   |
| 4  | <b>Figure S4.</b> The $^1\text{H}$ NMR spectrum of compound <b>1</b> in acetone- $d_6$                  | S4   |
| 5  | <b>Figure S5.</b> The $^{13}\text{C}$ NMR spectrum of compound <b>1</b> in acetone- $d_6$               | S5   |
| 6  | <b>Figure S6.</b> The HSQC spectrum of compound <b>1</b> in acetone- $d_6$                              | S6   |
| 7  | <b>Figure S7.</b> The $^1\text{H}$ - $^1\text{H}$ COSY spectrum of compound <b>1</b> in acetone- $d_6$  | S7   |
| 8  | <b>Figure S8.</b> The HMBC spectrum of compound <b>1</b> in acetone- $d_6$                              | S8   |
| 9  | <b>Figure S9.</b> The UV spectrum of compound <b>2</b> in MeCN                                          | S9   |
| 10 | <b>Figure S10.</b> The IR spectrum of compound <b>2</b>                                                 | S10  |
| 11 | <b>Figure S11.</b> The (–)-HR-ESI-MS spectroscopic data of compound <b>2</b>                            | S11  |
| 12 | <b>Figure S12.</b> The $^1\text{H}$ NMR spectrum of compound <b>2</b> in acetone- $d_6$                 | S12  |
| 13 | <b>Figure S13.</b> The $^{13}\text{C}$ NMR spectrum of compound <b>2</b> in acetone- $d_6$              | S13  |
| 14 | <b>Figure S14.</b> The HSQC spectrum of compound <b>2</b> in acetone- $d_6$                             | S14  |
| 15 | <b>Figure S15.</b> The $^1\text{H}$ - $^1\text{H}$ COSY spectrum of compound <b>2</b> in acetone- $d_6$ | S15  |
| 16 | <b>Figure S16.</b> The HMBC spectrum of compound <b>2</b> in acetone- $d_6$                             | S16  |
| 17 | <b>Table S1.</b> The original western blots in three repetitions for Figure 6 in the paper              | S17  |
| 18 | <b>Table S2.</b> The original western blots in three repetitions for Figure 7 in the paper              | S19  |

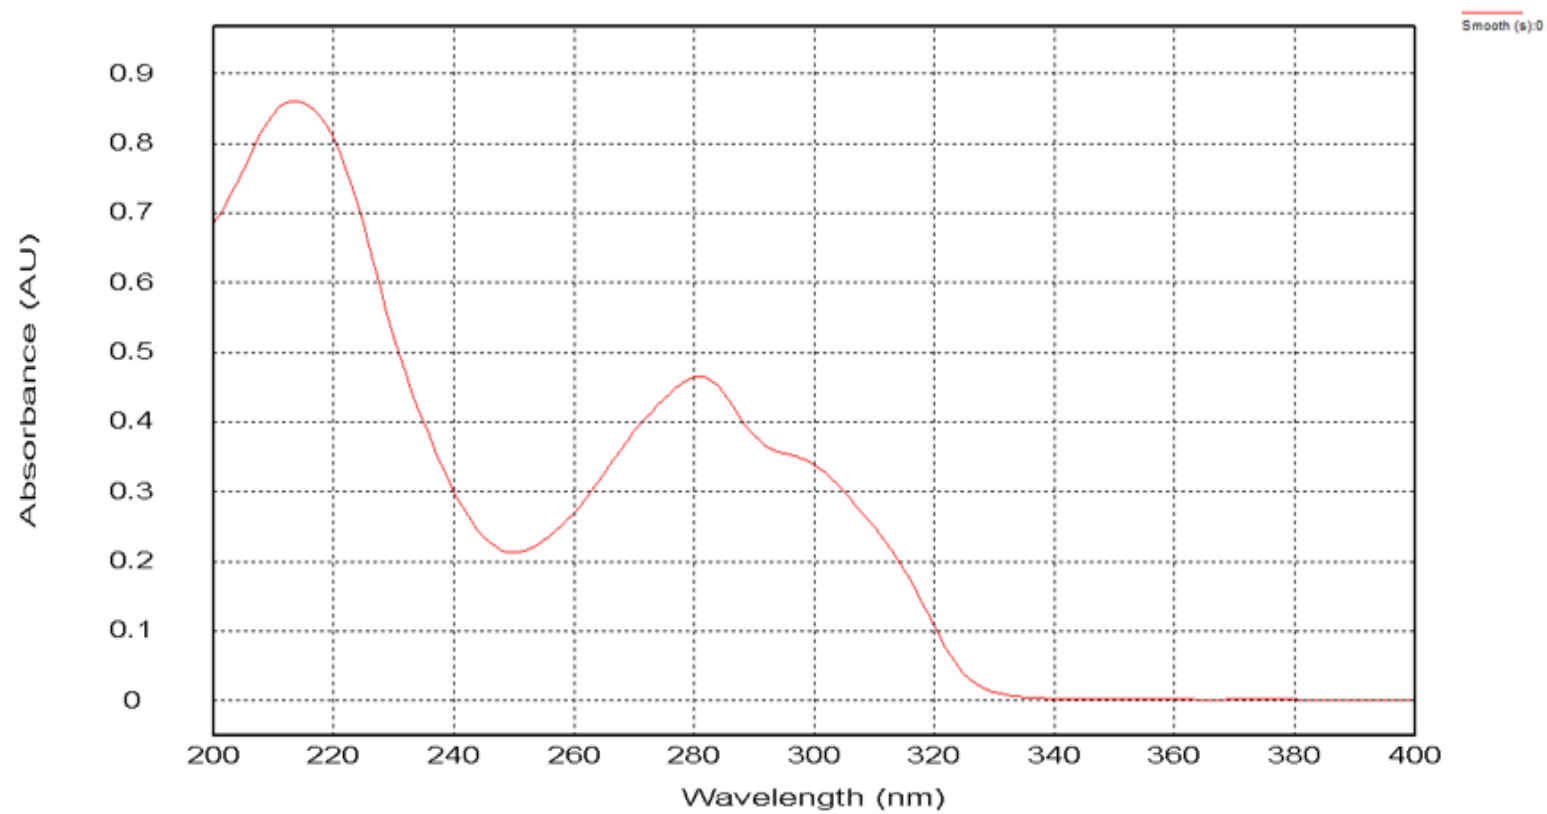

**Figure S1.** The UV spectrum of compound **1** in MeCN.

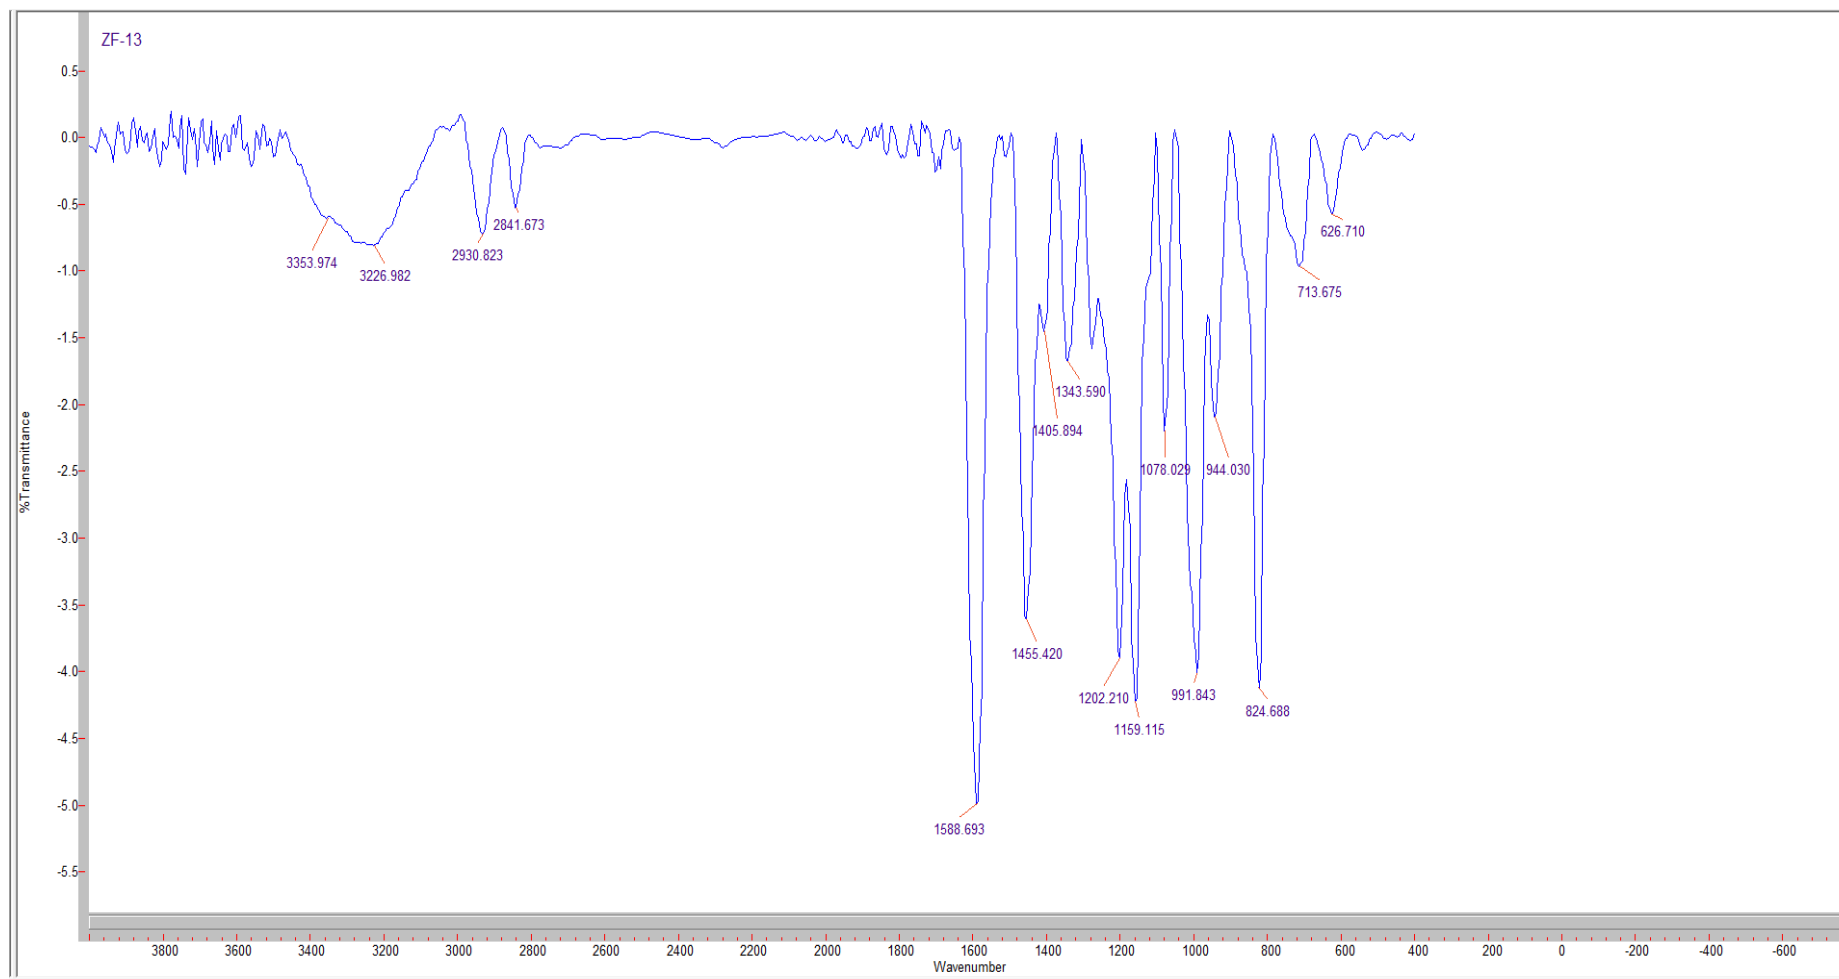

**Figure S2.** The IR spectrum of compound **1**.

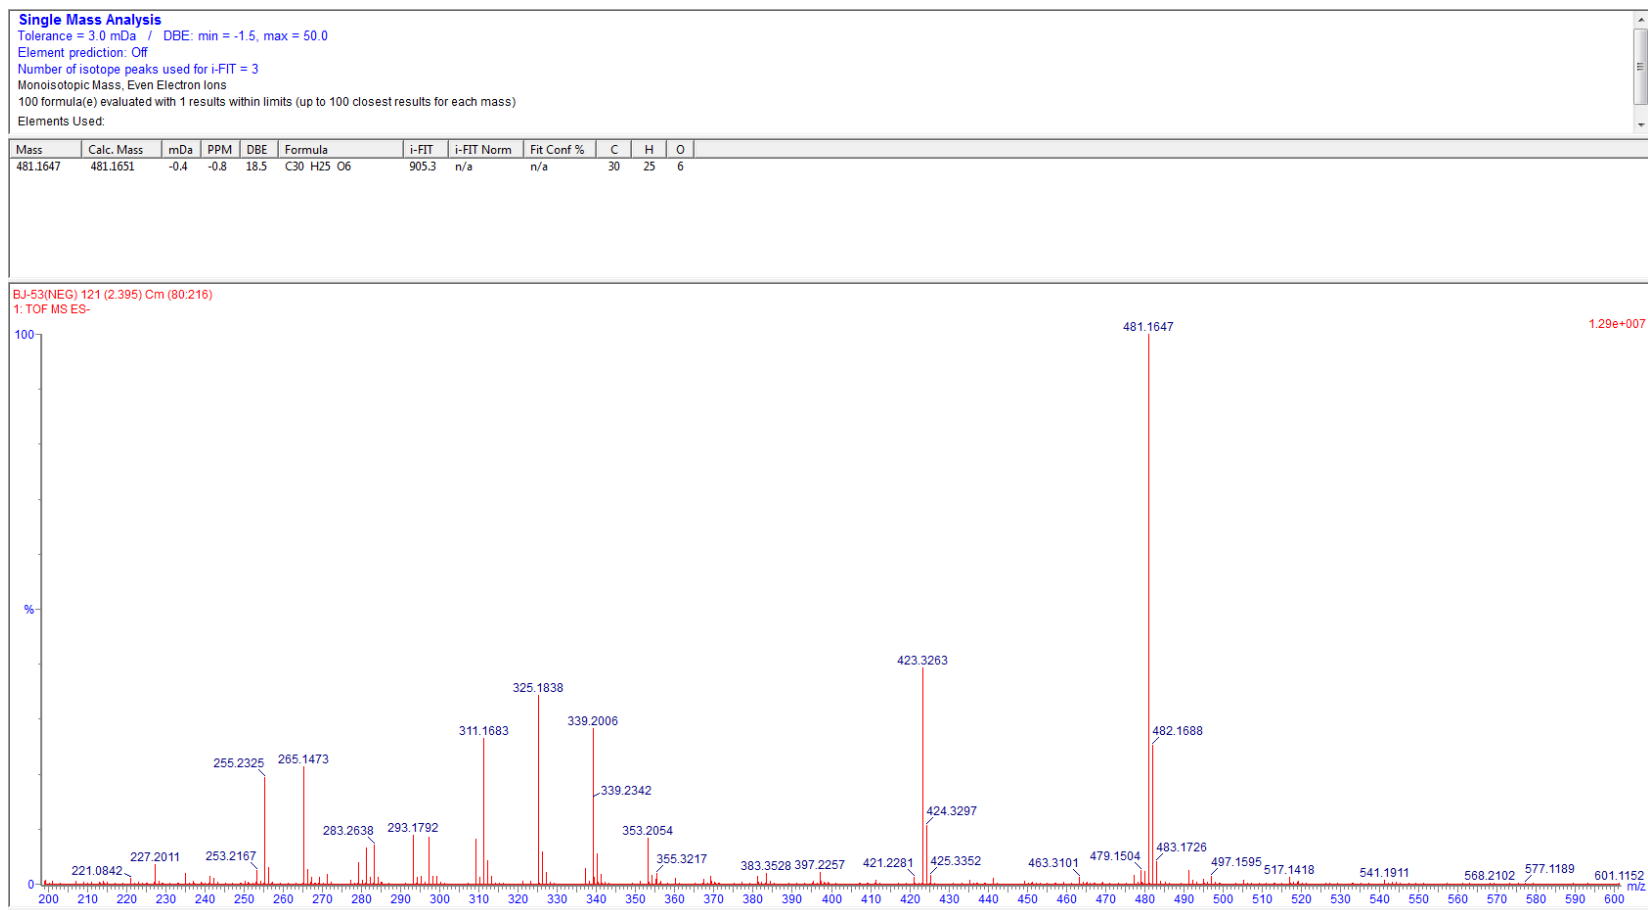

**Figure S3.** The (–)-HR-ESI-MS spectroscopic data of compound **1**.

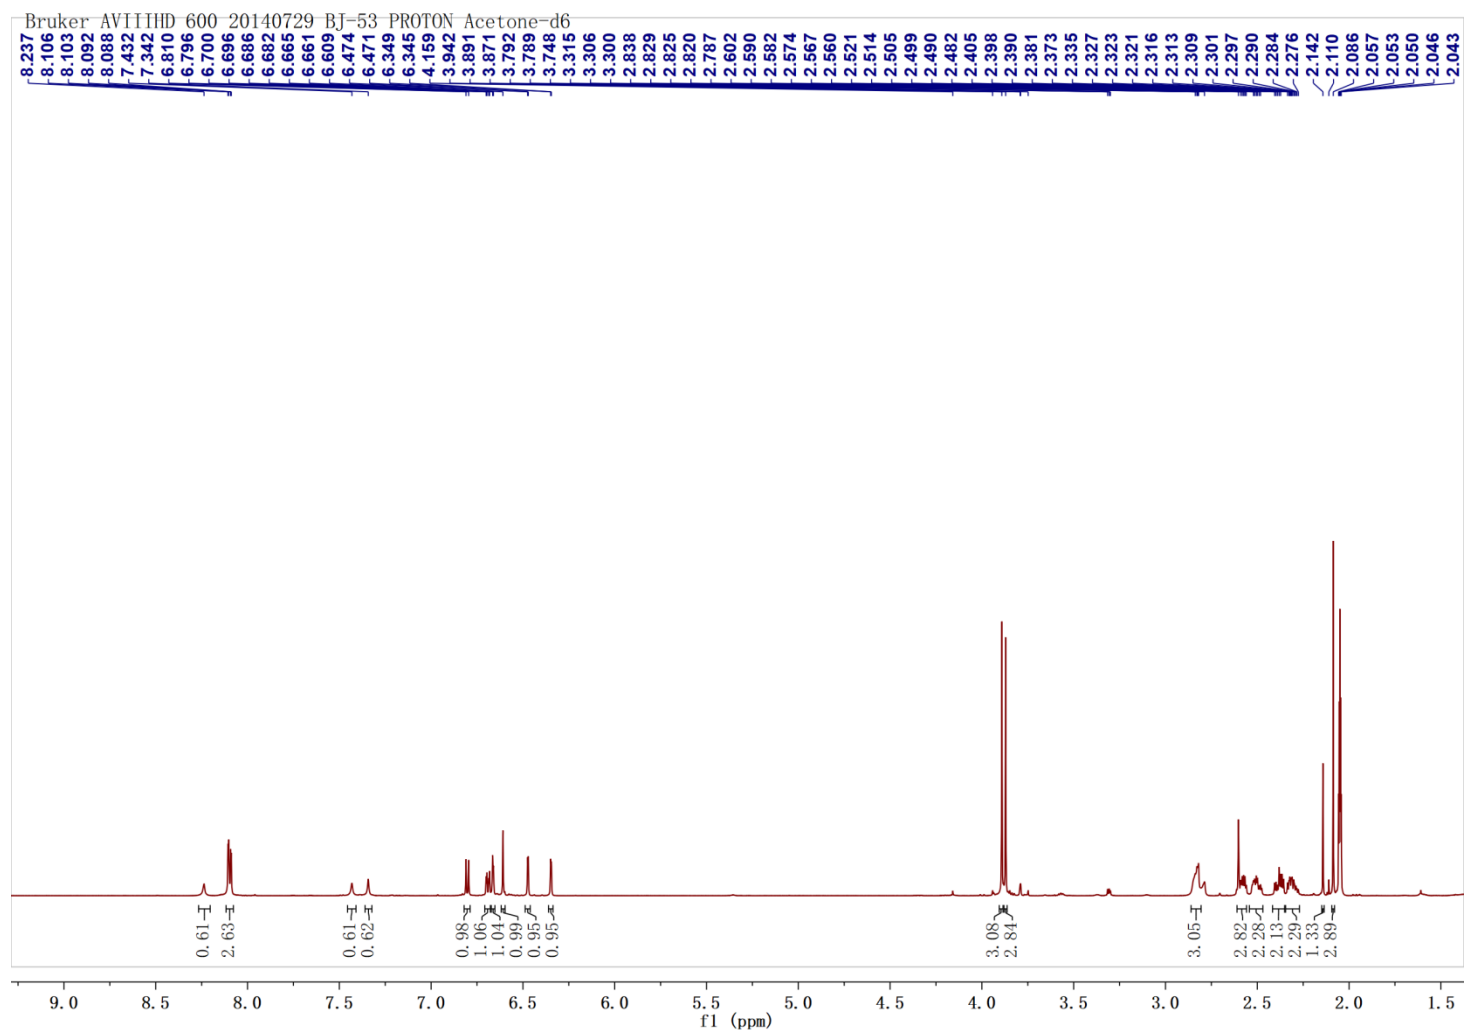

**Figure S4.** The  $^1\text{H}$  NMR spectrum of compound **1** in acetone- $d_6$ .

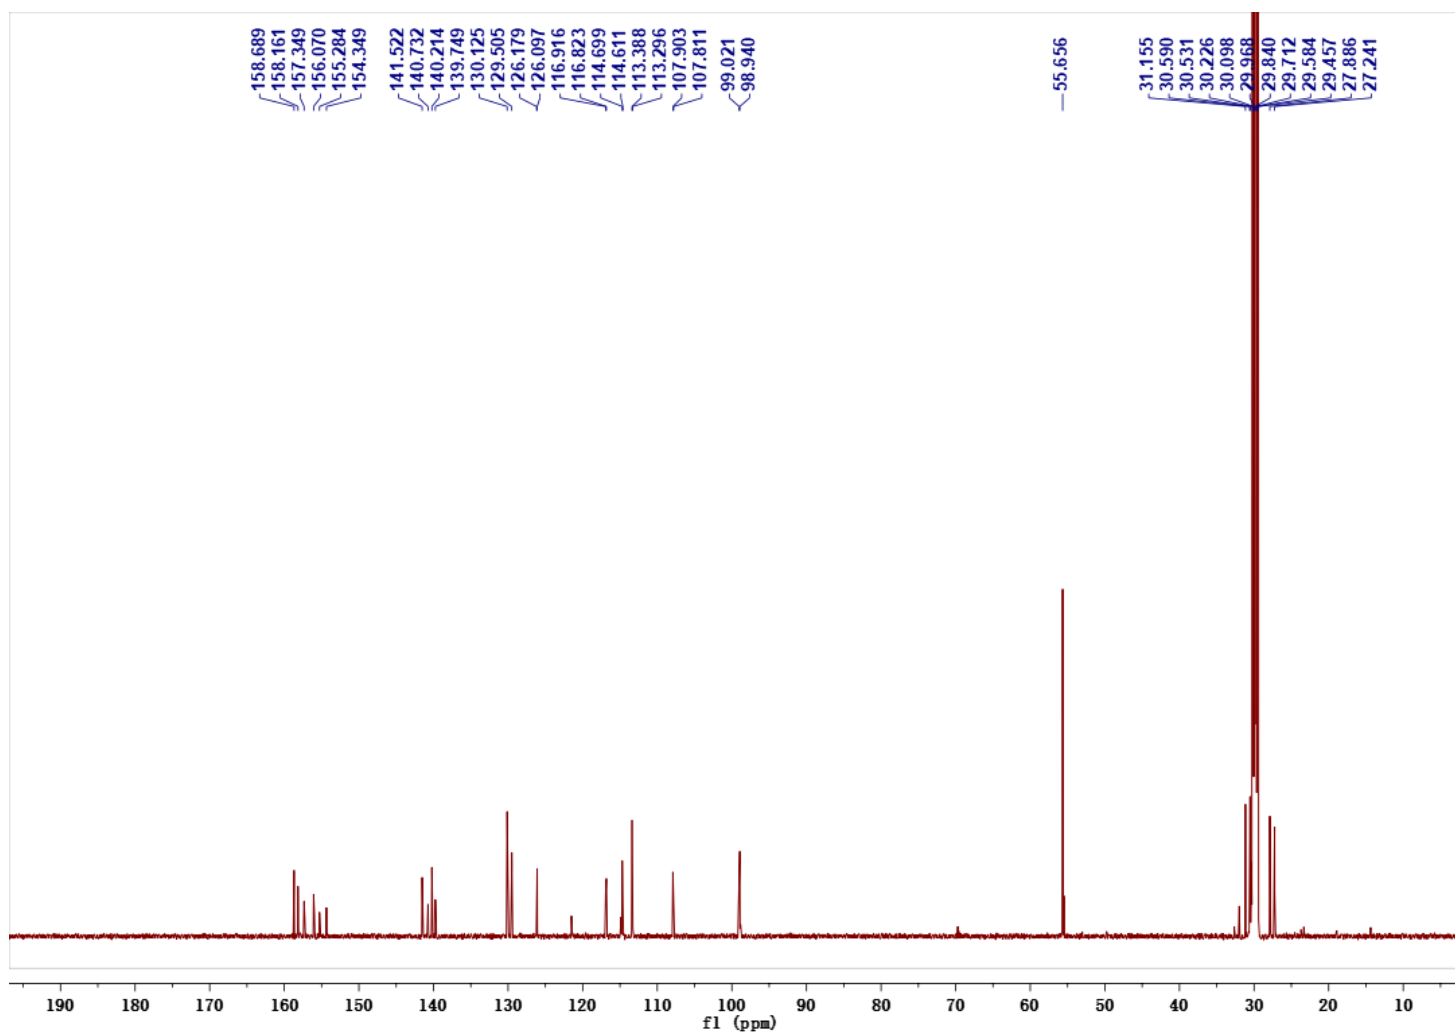

**Figure S5.** The <sup>13</sup>C NMR spectrum of compound **1** in acetone-*d*<sub>6</sub>.

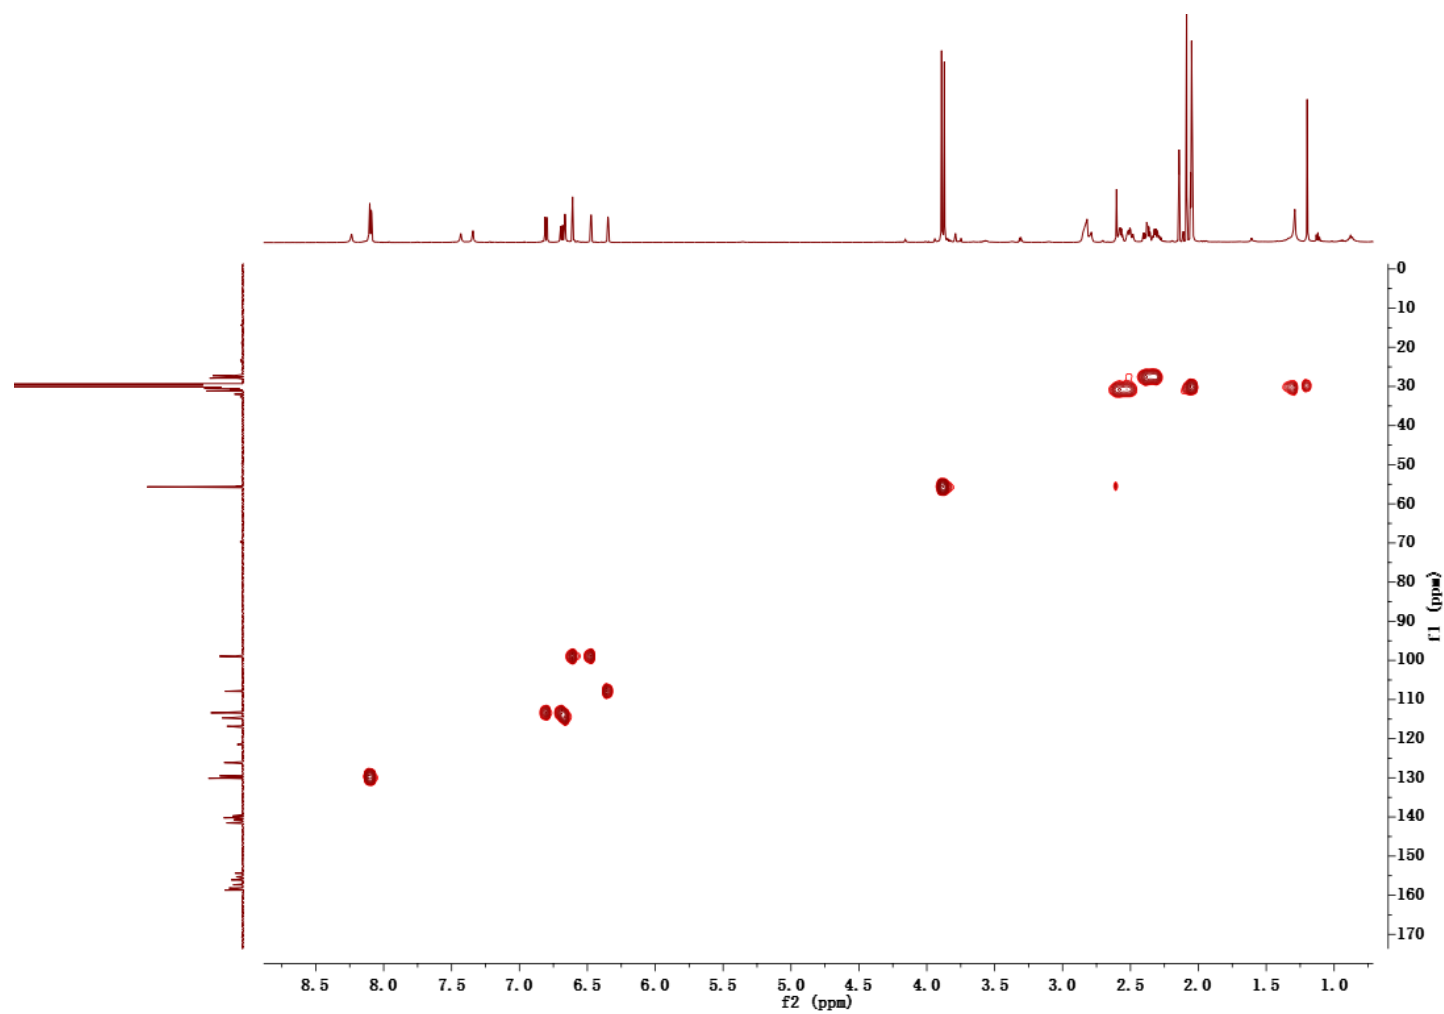

**Figure S6.** The HSQC spectrum of compound **1** in acetone- $d_6$ .



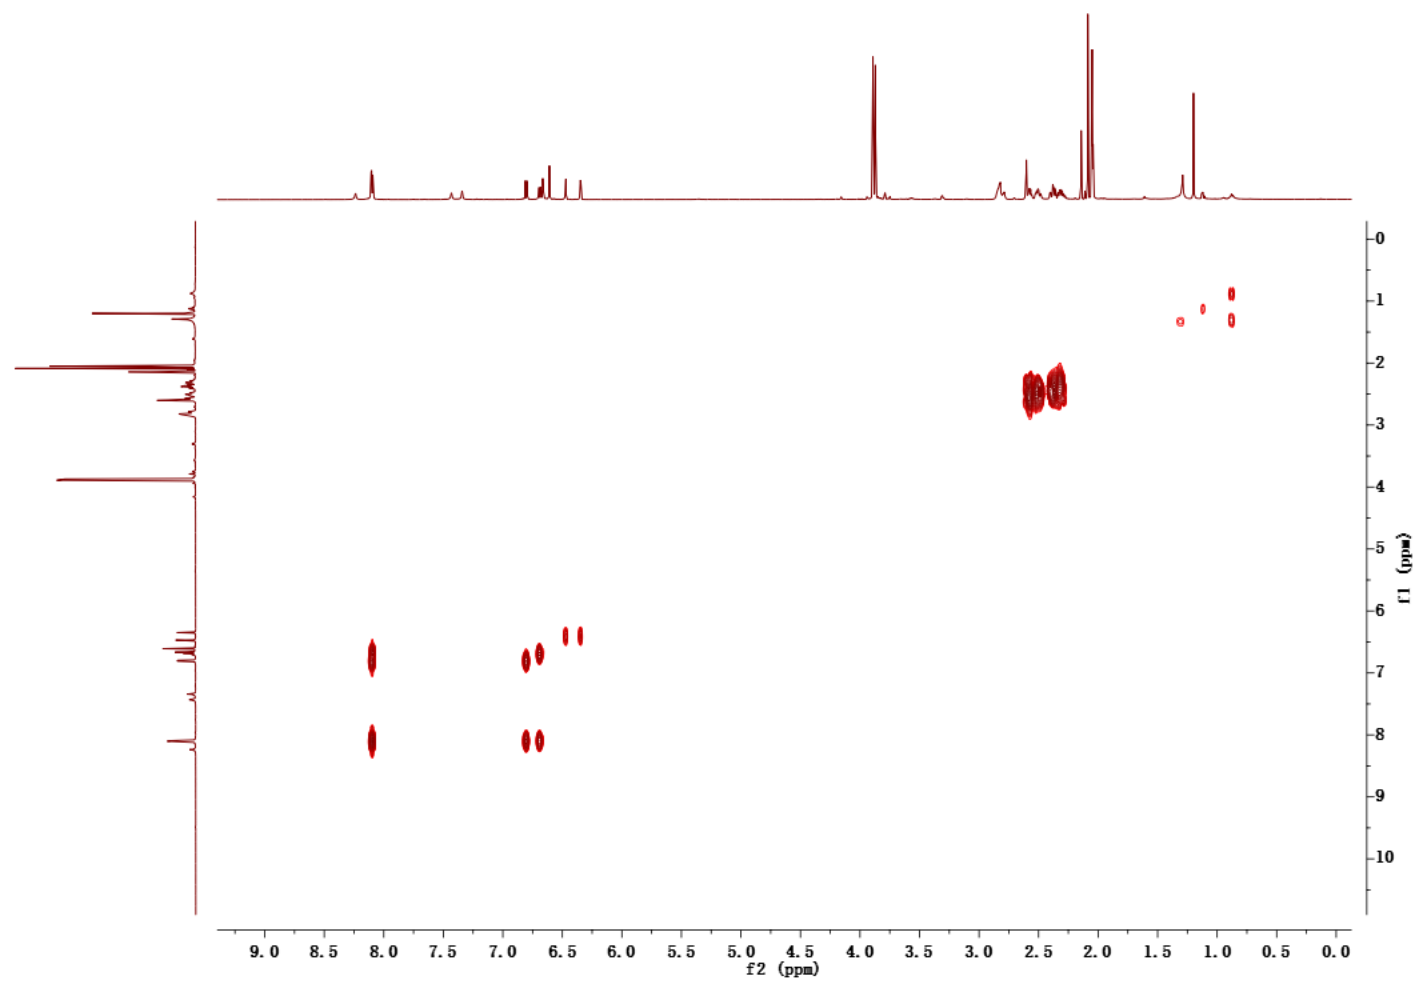

**Figure S7.** The  $^1\text{H}$ - $^1\text{H}$  COSY spectrum of compound **1** in acetone- $d_6$ .

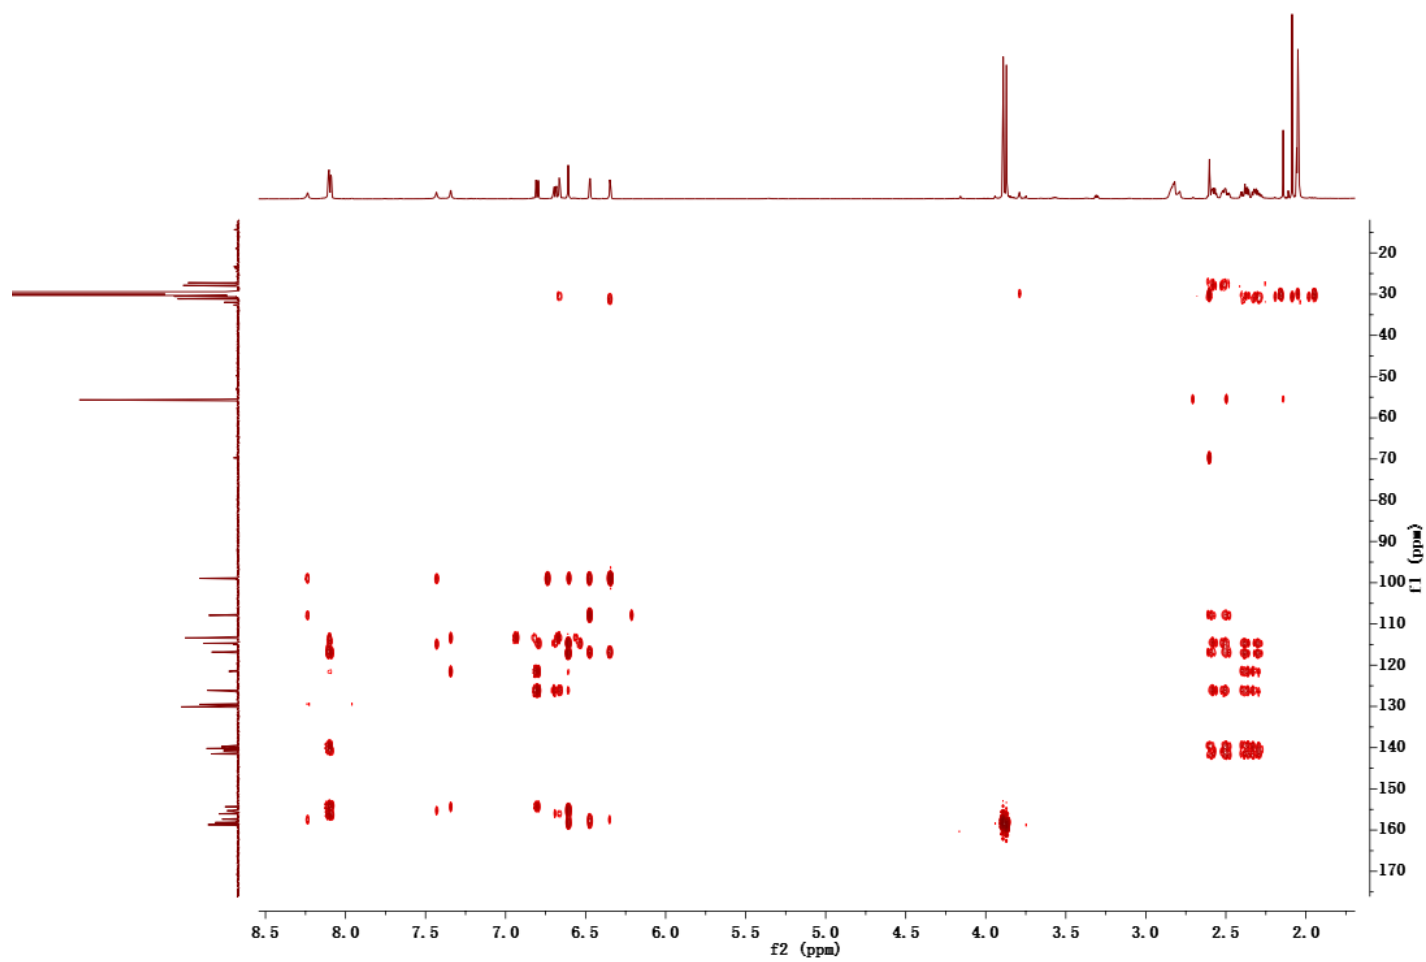

**Figure S8.** The HMBC spectrum of compound **1** in acetone- $d_6$ .

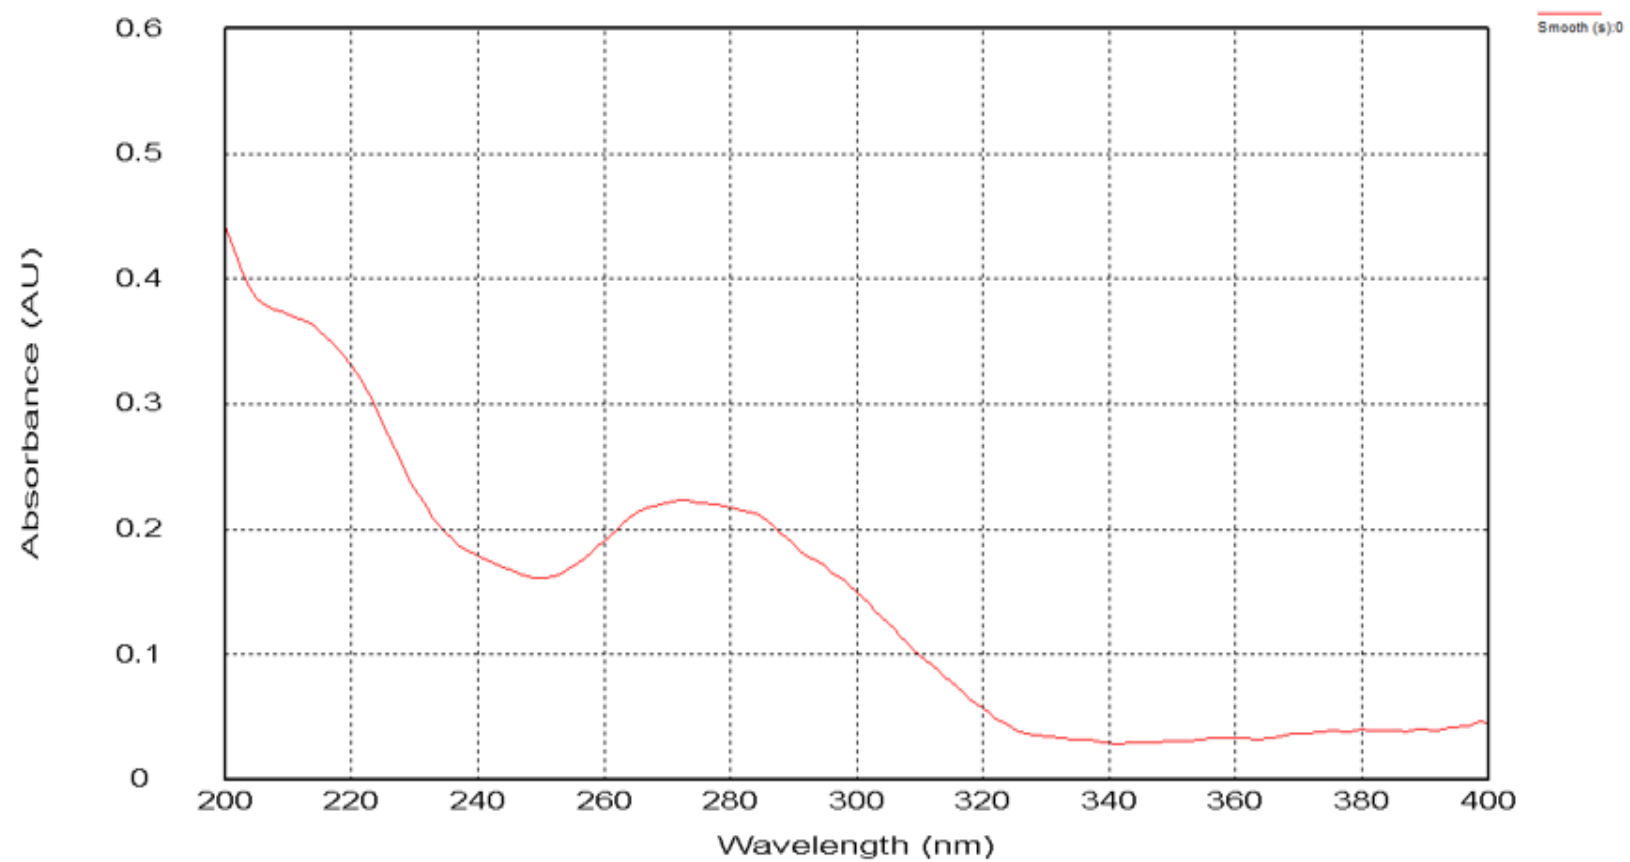

**Figure S9.** The UV spectrum of compound **2** in MeCN.

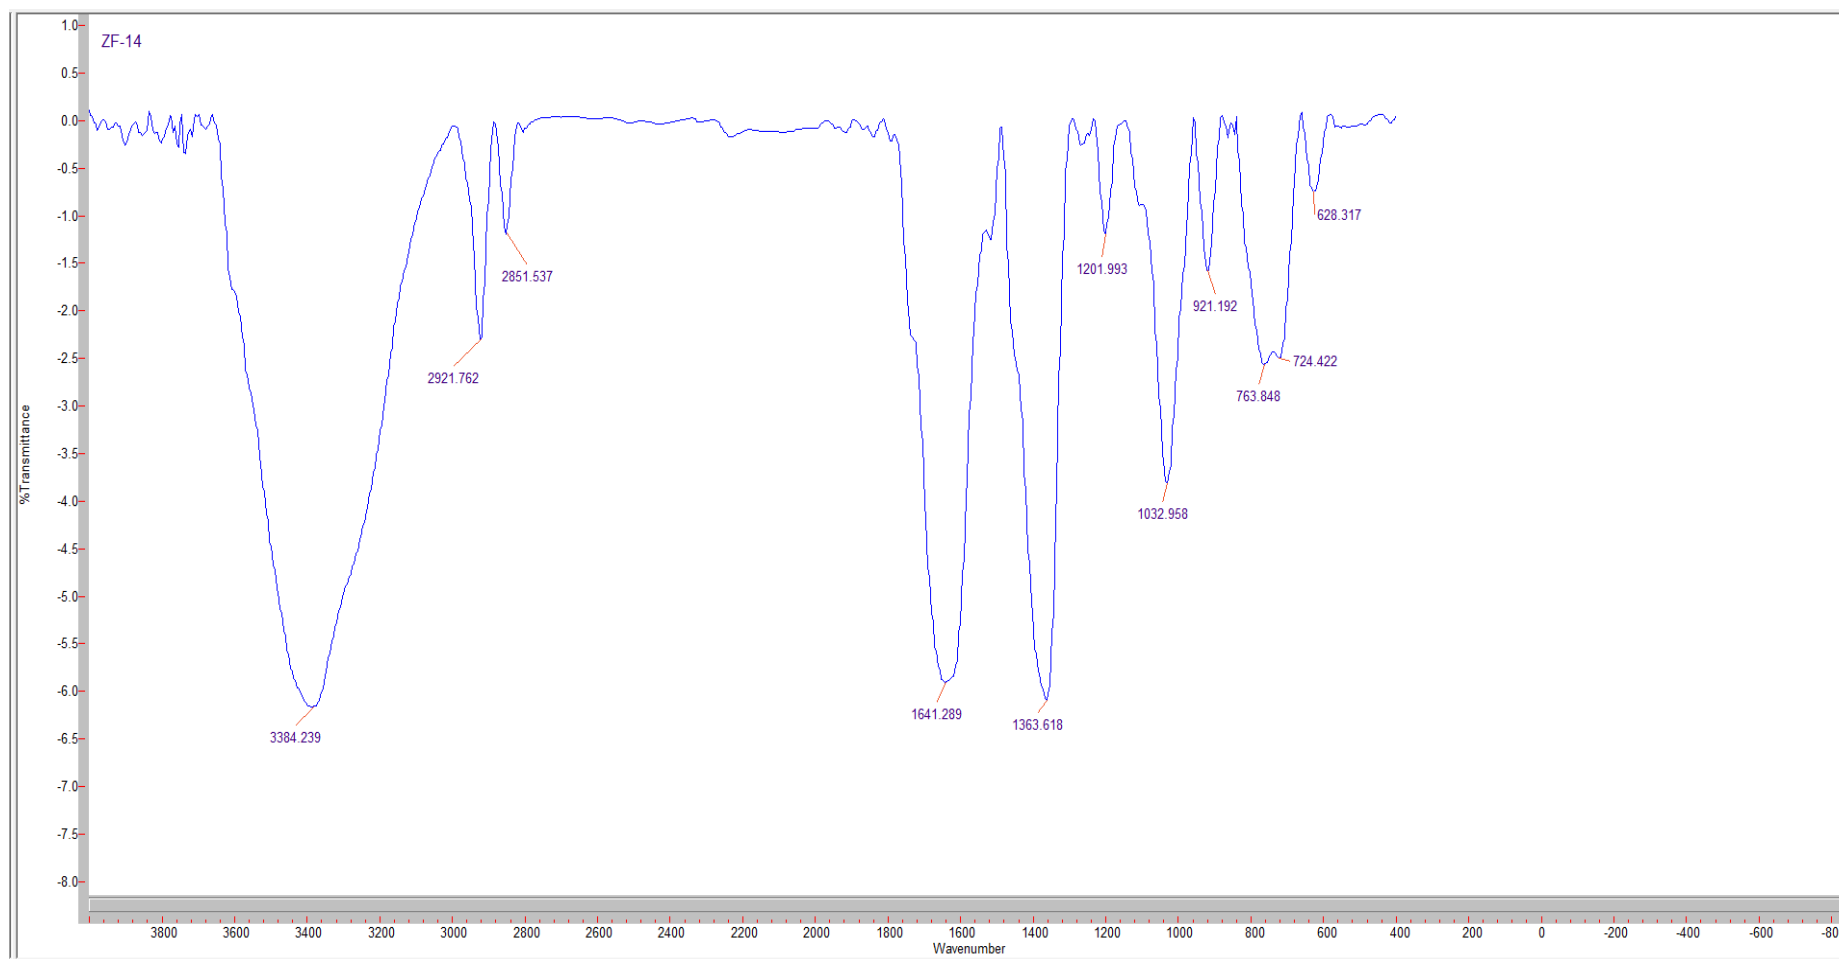

**Figure S10.** The IR spectrum of compound **2**.

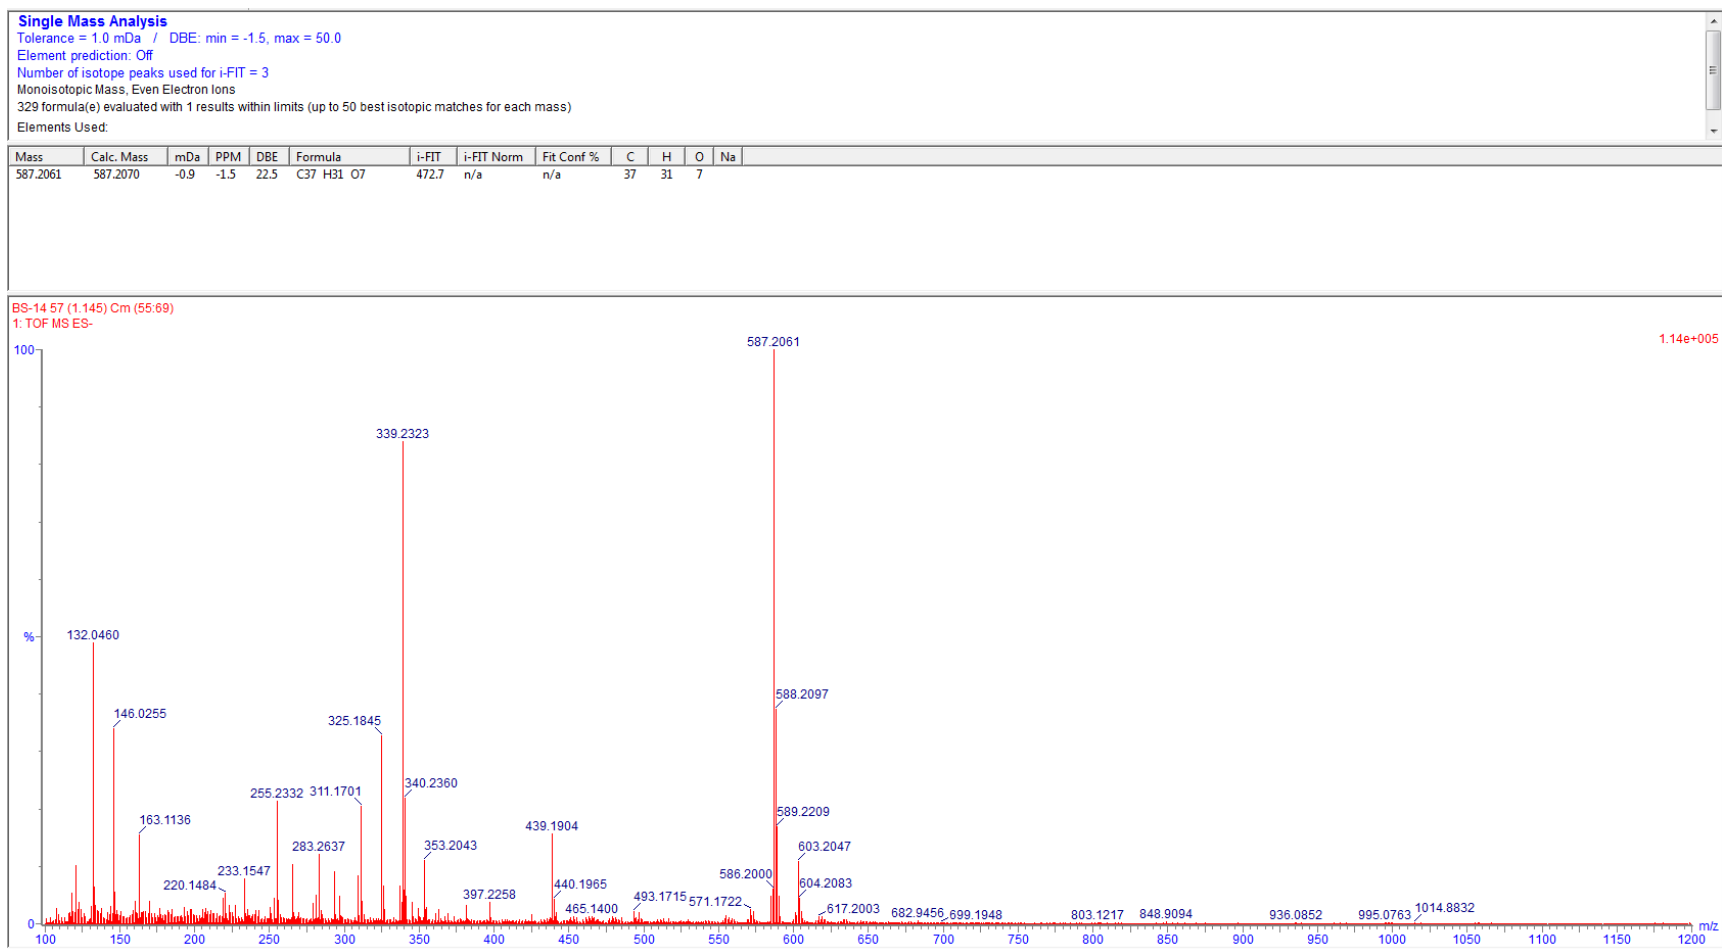

**Figure S11.** The (–)-HR-ESI-MS spectroscopic data of compound **2**.

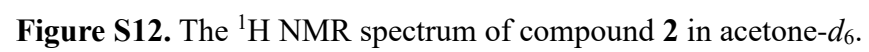

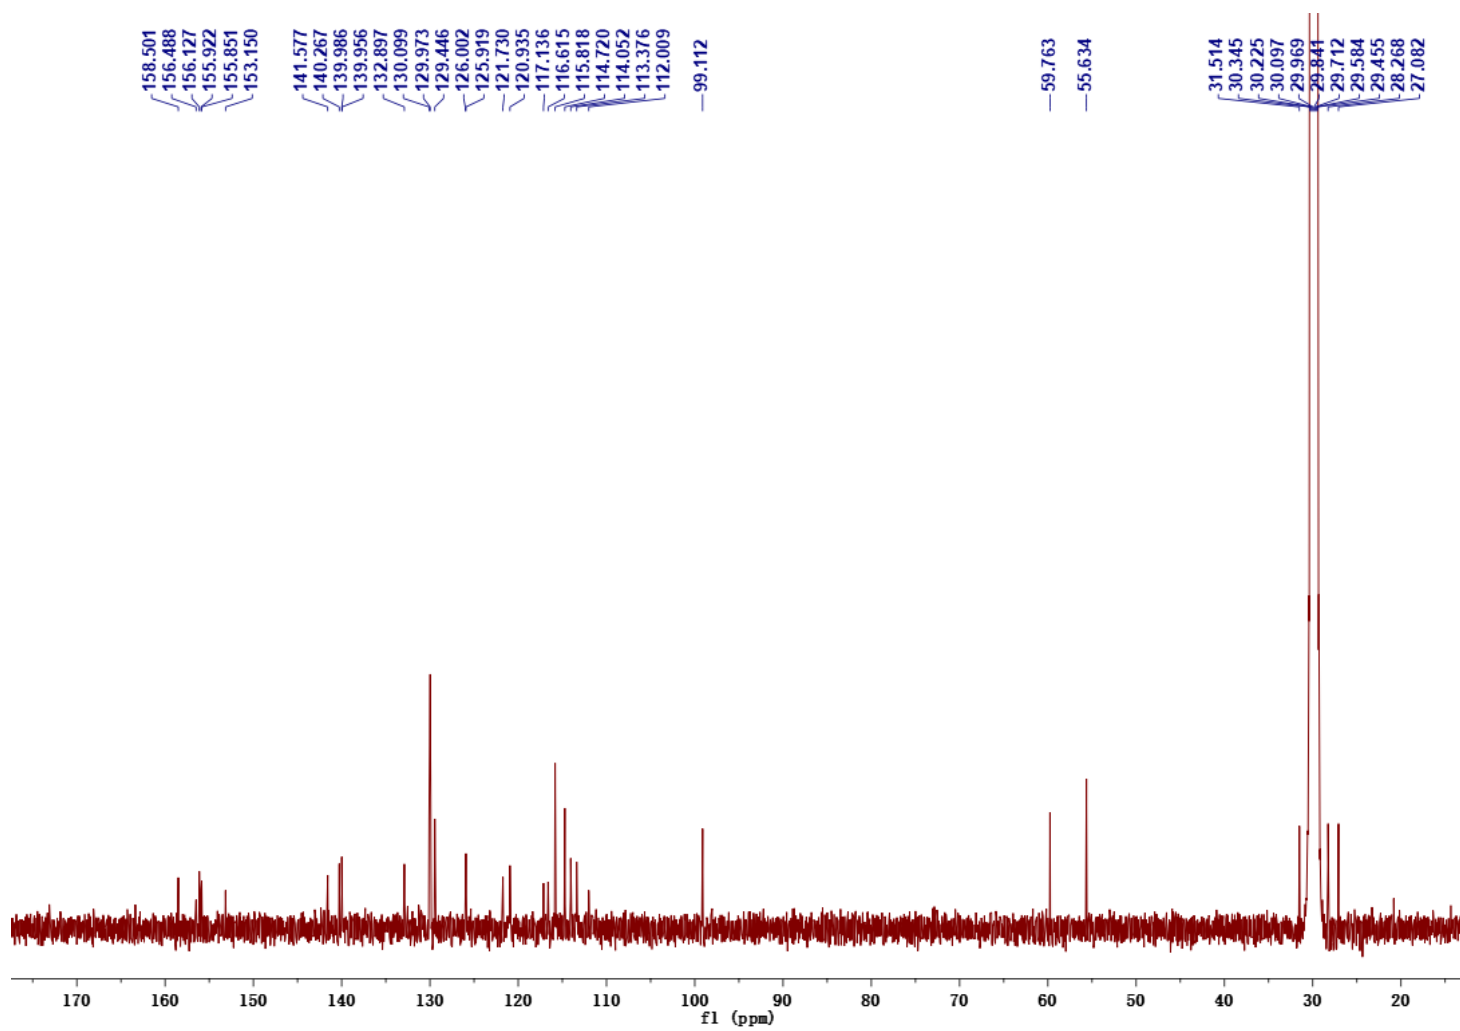

**Figure S13.** The  $^{13}\text{C}$  NMR spectrum of compound **2** in acetone- $d_6$ .

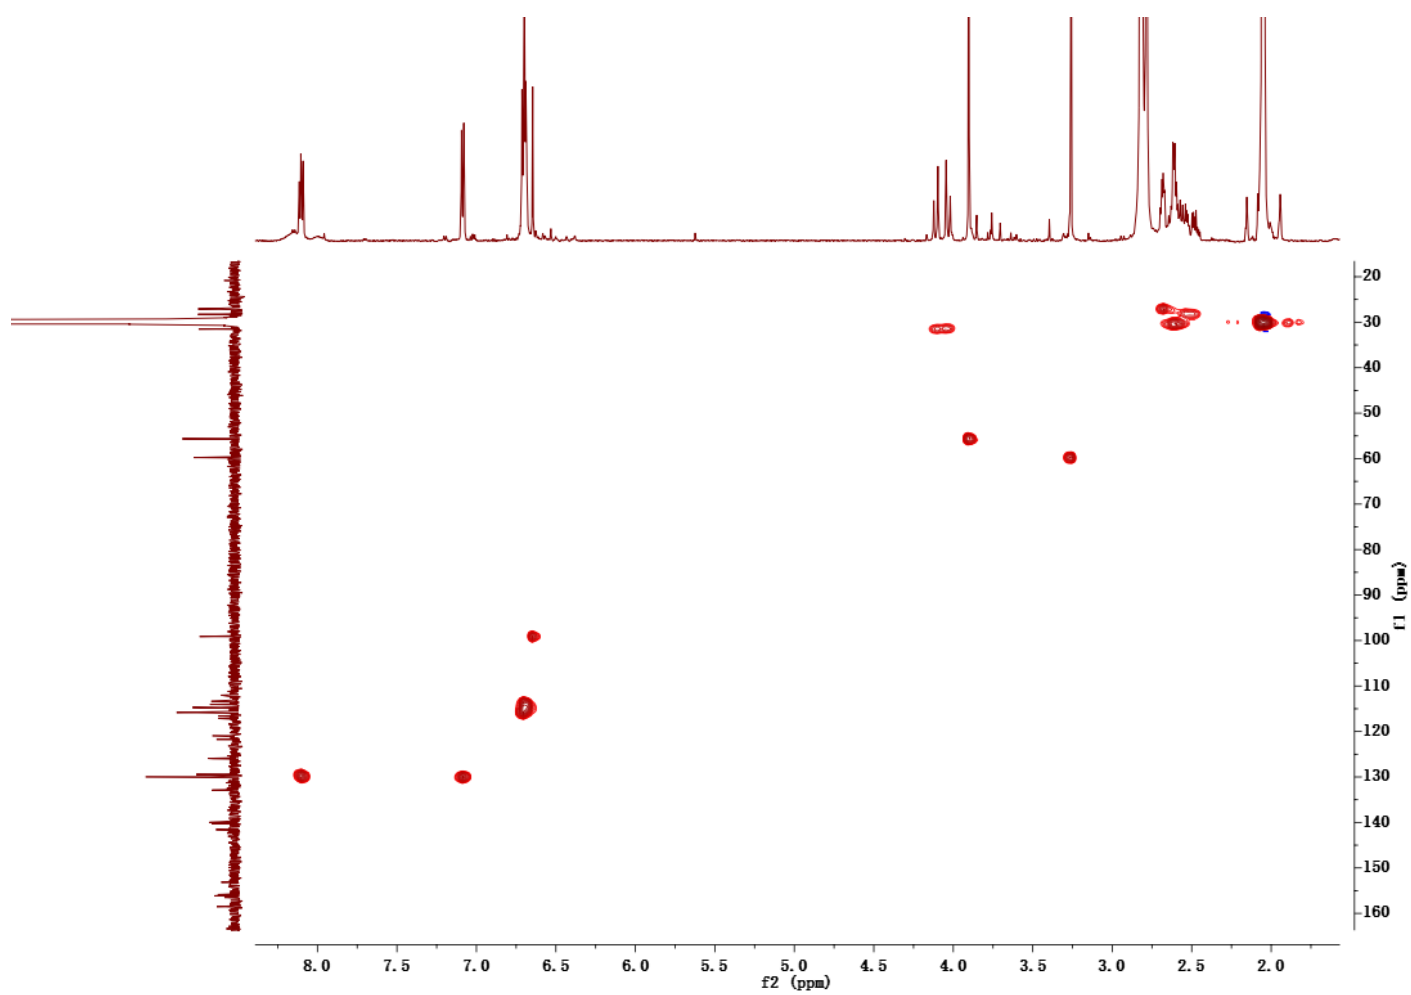

**Figure S14.** The HSQC spectrum of compound **2** in acetone- $d_6$ .



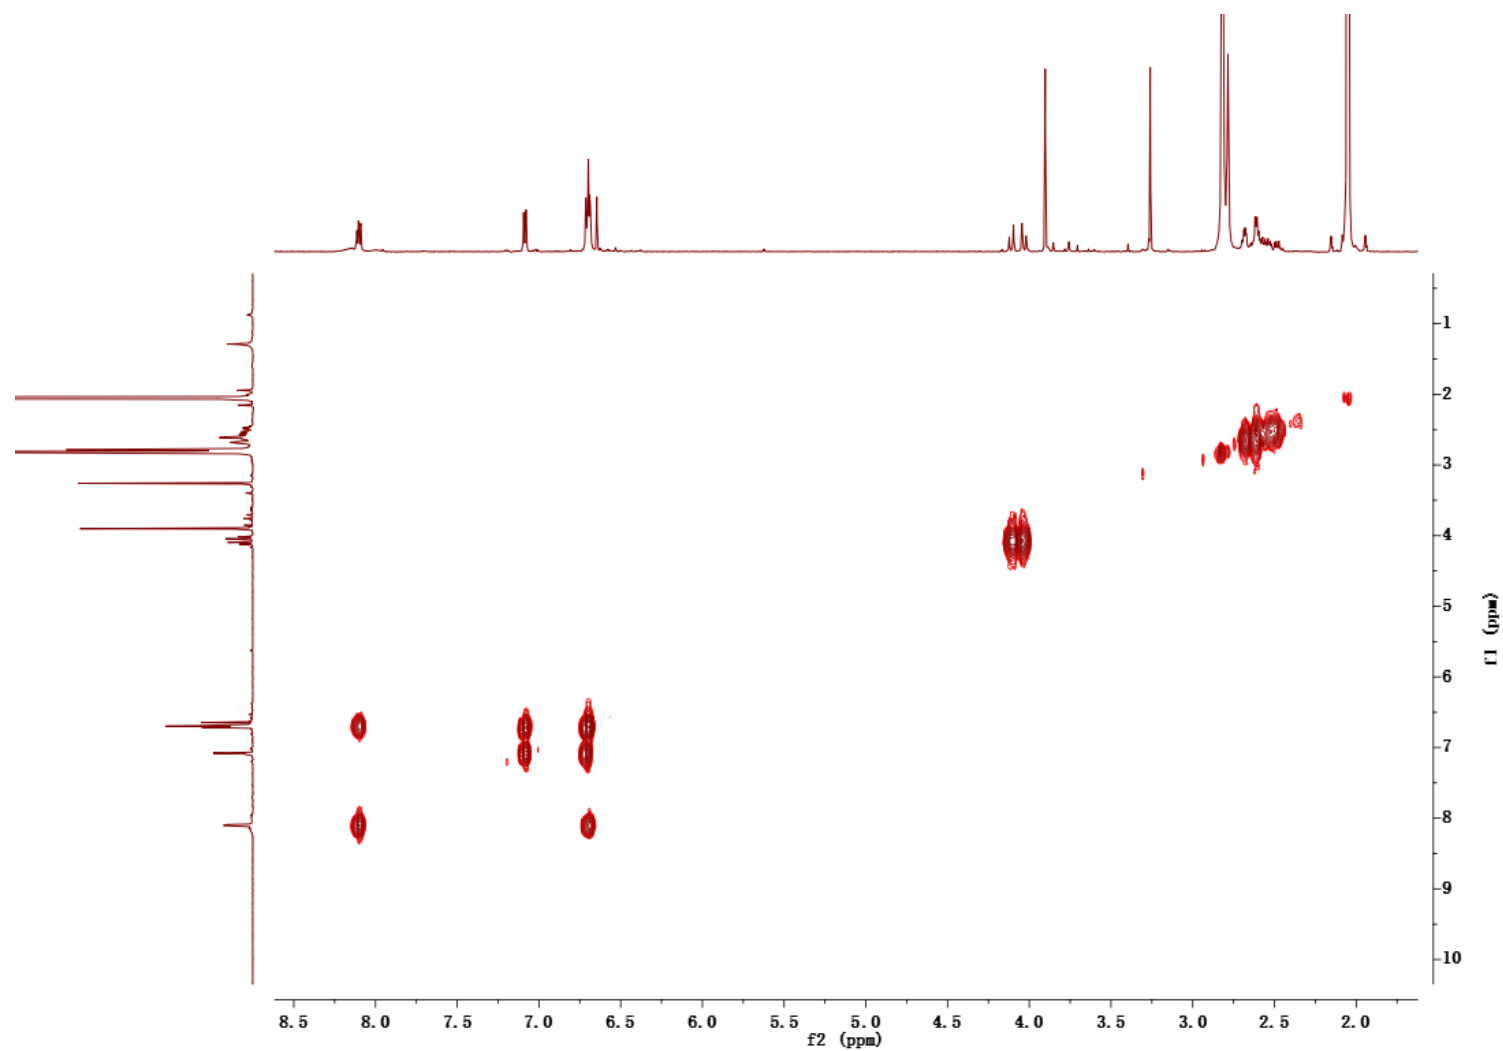

**Figure S15.** The  $^1\text{H}$ - $^1\text{H}$  COSY spectrum of compound **2** in acetone- $d_6$ .

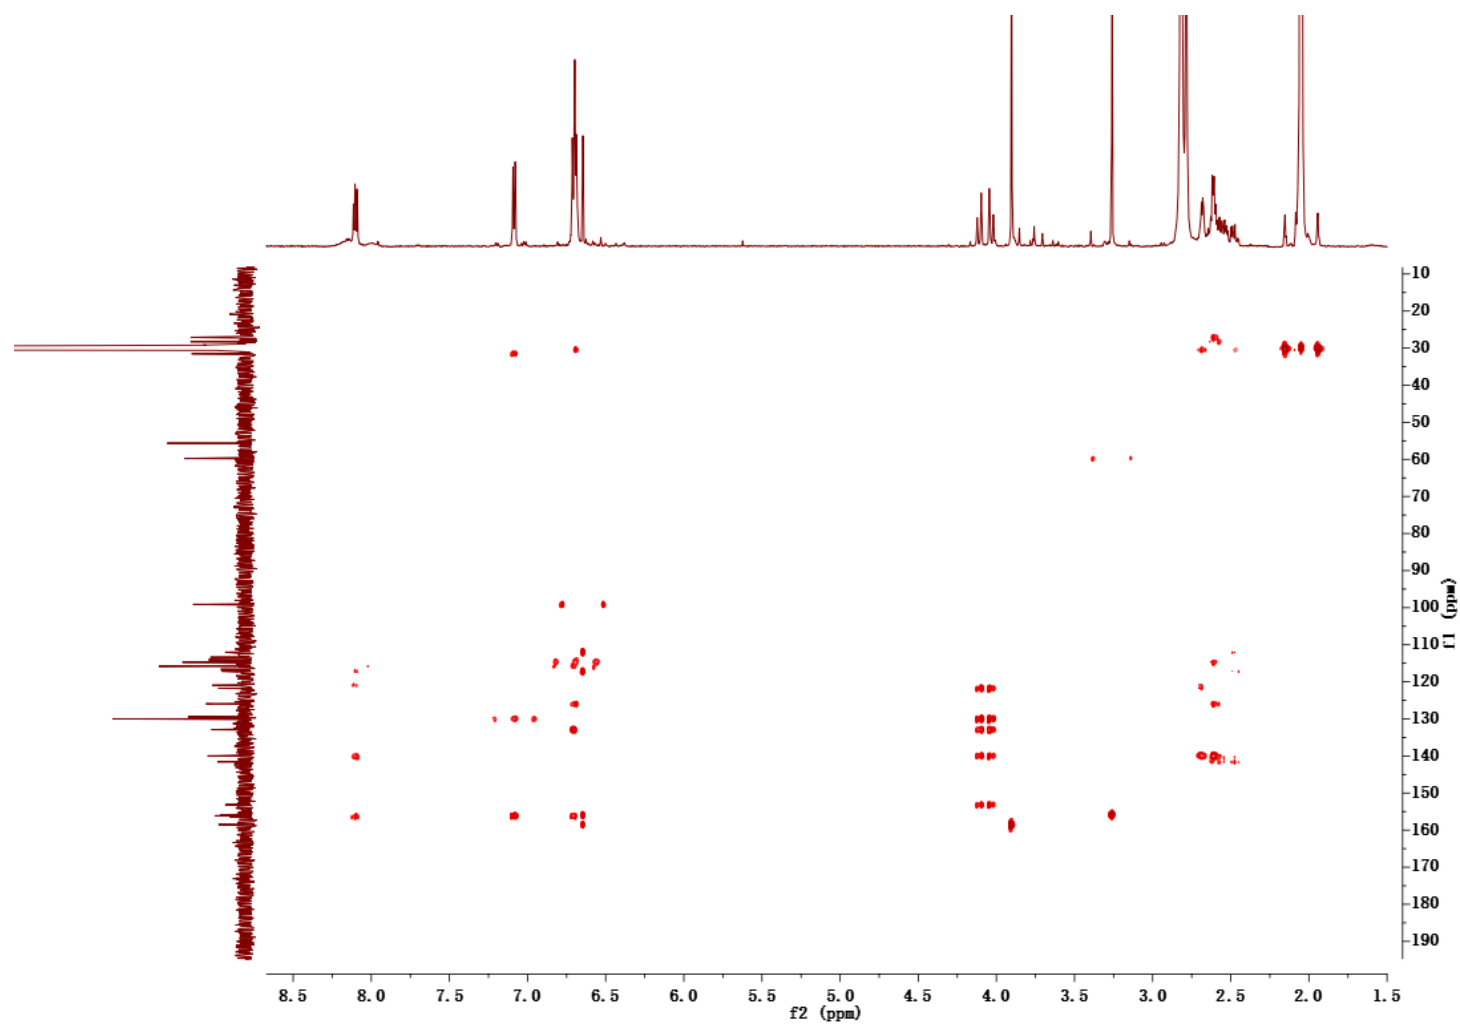

**Figure S16.** The HMBC spectrum of compound **2** in acetone- $d_6$ .

**Table S1.** The original western blots in three repetitions for Figure 6 in the paper.

|                       | n <sub>1</sub>                                                                     | n <sub>2</sub>                                                                       | n <sub>3</sub>                                                                       |
|-----------------------|------------------------------------------------------------------------------------|--------------------------------------------------------------------------------------|--------------------------------------------------------------------------------------|
| p-AKT (Ser473)        | 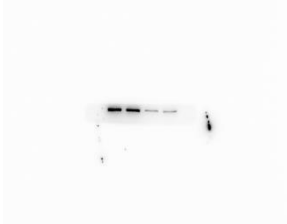  |   |   |
| AKT                   |   |   |   |
| p-MEK1/2 (Ser217/221) |  |  |  |

---

MEK1/2

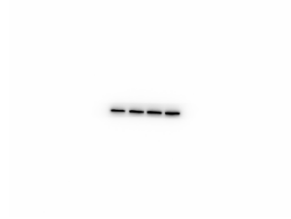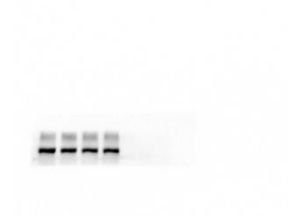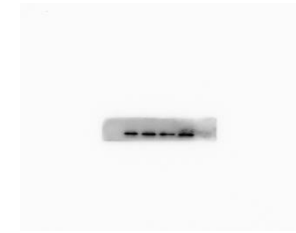

p-ERK1/2  
(Thr202/Tyr204)

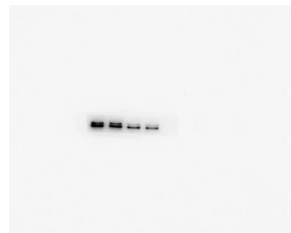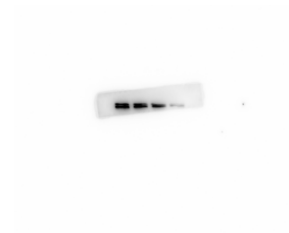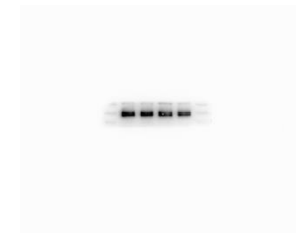

ERK1/2

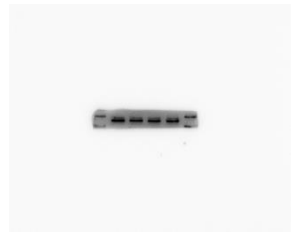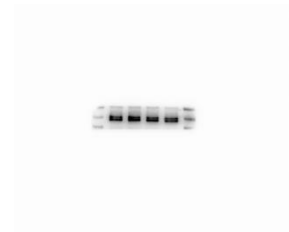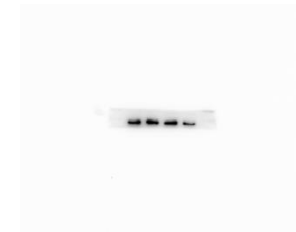

$\beta$ -actin

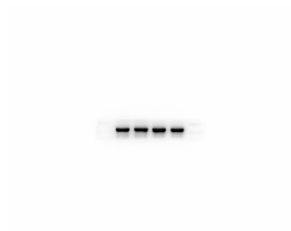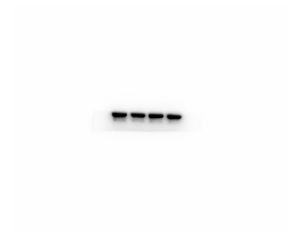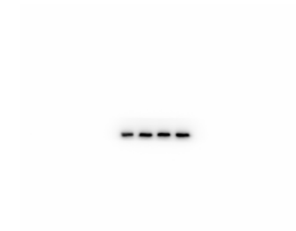

**Table S2.** The original western blots in three repetitions for Figure 7 in the paper.

|         | n <sub>1</sub>                                                                     | n <sub>2</sub>                                                                       | n <sub>3</sub>                                                                       |
|---------|------------------------------------------------------------------------------------|--------------------------------------------------------------------------------------|--------------------------------------------------------------------------------------|
| Bcl-2   |   |   |   |
| Bax     |   |   |   |
| β-actin |  |  |  |
